# Supplementary material for: Toward the development of a novel non-RGD cyclic peptide drug conjugate for treatment of human metastatic melanoma
Source: PubMed Central journal article supplement (PMC5352194; doi:10.18632/oncotarget.12748), 2016-10-19
Supplement: oncotarget-08-757-s001.pdf [file oncotarget-08-757-s001.pdf]

## Toward the development of a novel non-RGD cyclic peptide drug conjugate for treatment of human metastatic melanoma

### SUPPLEMENTARY FIGURES

#### FACS ANALYSIS:

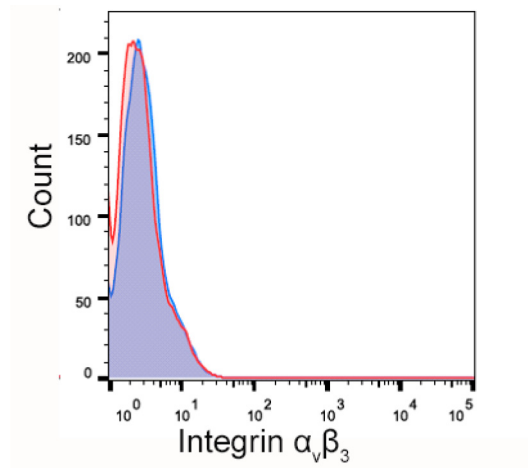

Supplementary Figure S1: Expression of integrin  $\alpha_v\beta_3$  in HEK293 cells was evaluated by FACS analysis using FITC-conjugated integrin  $\alpha_v\beta_3$  antibody (red- control cells w/o an antibody, blue- cells incubated with FITC-conjugated integrin  $\alpha_v\beta_3$  antibody).

SPECTRA:

ALOS4  
HRMS:

Qualitative Compound Report

| Compound Table           |       |          |       |                   |          |            |  |
|--------------------------|-------|----------|-------|-------------------|----------|------------|--|
| Compound Label           | RT    | Mass     | Abund | Formula           | Tgt Mass | Diff (ppm) |  |
| Cpd 1: C35 H53 N9 O13 S2 | 0.133 | 871.3193 | 2411  | C35 H53 N9 O13 S2 | 871.3204 | -1.3       |  |

| Compound Label           | m/z      | RT    | Algorithm       | Mass     |
|--------------------------|----------|-------|-----------------|----------|
| Cpd 1: C35 H53 N9 O13 S2 | 894.3097 | 0.133 | Find By Formula | 871.3193 |

MS Spectrum

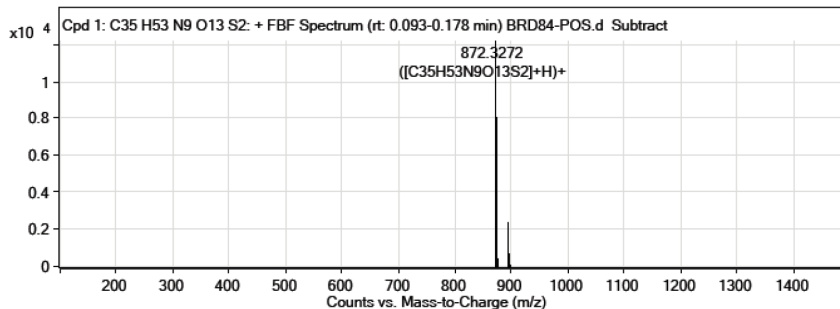

MS Zoomed Spectrum

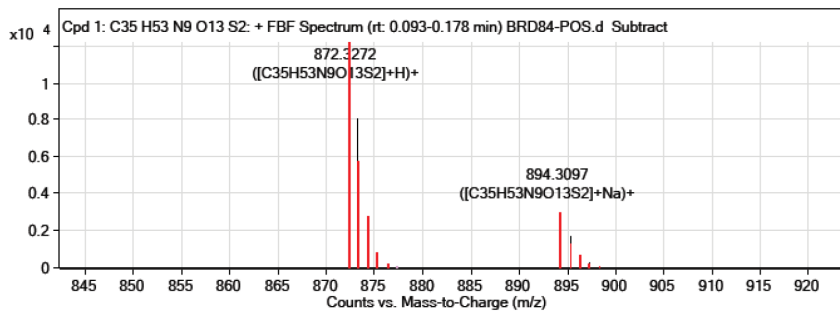

MS Spectrum Peak List

| m/z      | z | Abund    | Formula       | Ion     |
|----------|---|----------|---------------|---------|
| 872.3272 | 1 | 12169.84 | C35H53N9O13S2 | (M+H)+  |
| 873.3268 | 1 | 8004.44  | C35H53N9O13S2 | (M+H)+  |
| 874.3278 | 1 | 1698.42  | C35H53N9O13S2 | (M+H)+  |
| 875.3292 | 1 | 408.91   | C35H53N9O13S2 | (M+H)+  |
| 876.3216 | 1 | 194.63   | C35H53N9O13S2 | (M+H)+  |
| 894.3097 | 1 | 2480.53  | C35H53N9O13S2 | (M+Na)+ |
| 895.3094 | 1 | 1701.33  | C35H53N9O13S2 | (M+Na)+ |
| 896.3069 | 1 | 601.07   | C35H53N9O13S2 | (M+Na)+ |
| 897.3039 | 1 | 240.32   | C35H53N9O13S2 | (M+Na)+ |
| 898.3025 | 1 | 94.4     | C35H53N9O13S2 | (M+Na)+ |

--- End Of Report ---

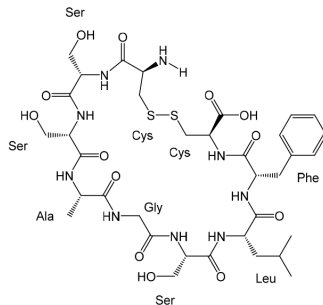

**ALOS4**  
Chemical Formula: C<sub>35</sub>H<sub>53</sub>N<sub>9</sub>O<sub>13</sub>S<sub>2</sub>  
Exact Mass: 871.32  
Molecular Weight: 871.98

Figure 2: ALOS4.

**ALOS4-FITC**  
ES-MS:

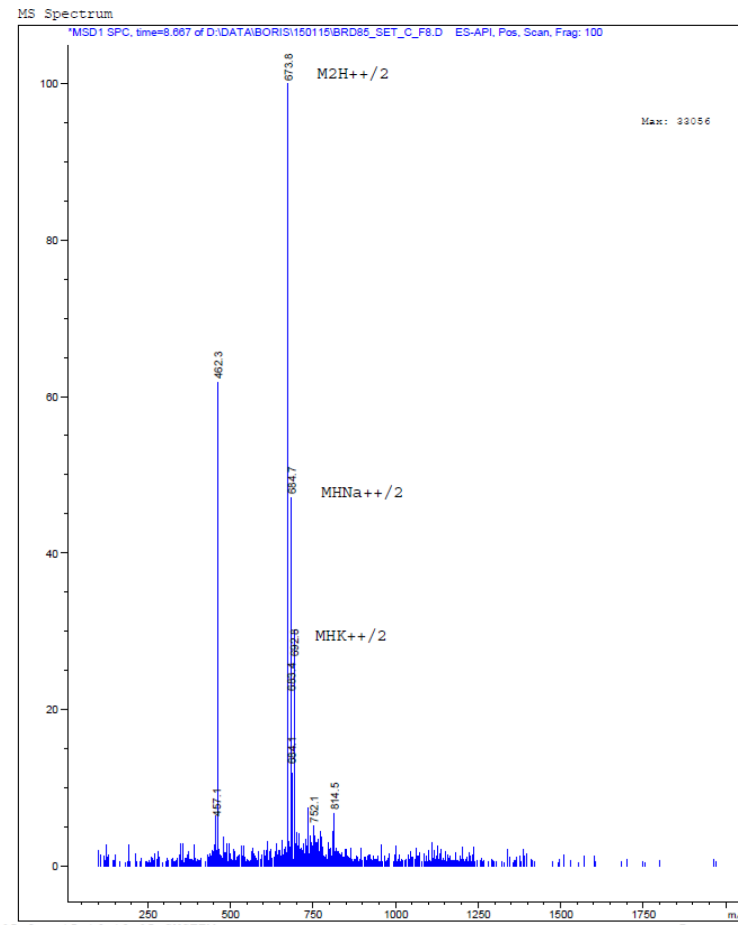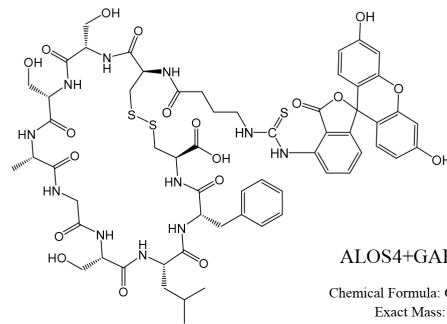

**Figure 3: ALOS4-FITC.**

**ALOS4-CPT**  
ES-MS:

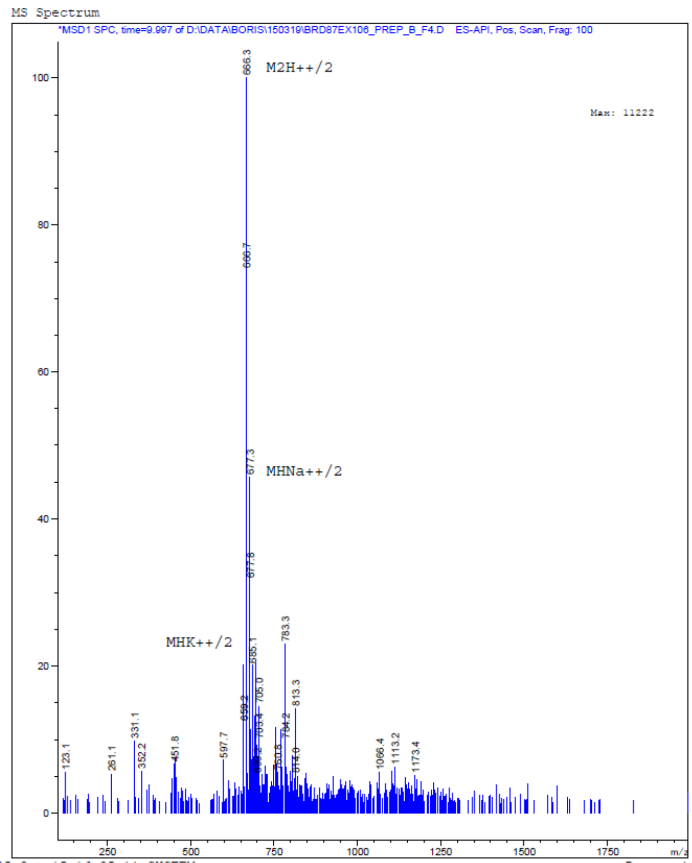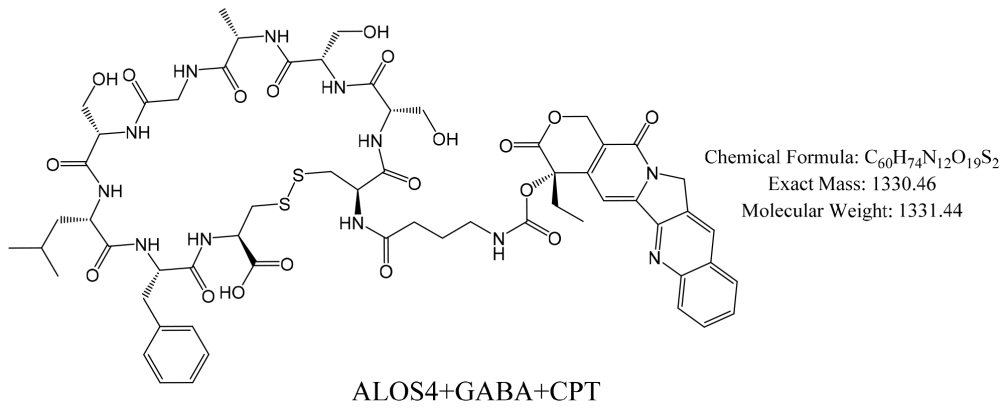

**Figure 4: ALOS4-CPT.**
